# Supplementary material
Source: Elsevier journal article supplement (https://comptes-rendus.academie-sciences.fr/geoscience/article/10.1016/j.crte.2008.12.005/file/attach/mmc3.pdf)
Supplement: mmc3 [file mmc3.pdf]

Table 3. SHRIMP U-Pb zircon data for gneiss from Asco and pyrigarnite from Fautea (Corsica, France).  
 Tableau 3. Analyses U-Pb sur zircon (SHRIMP) pour les gneiss d'Asco et les pyrigarnites  
 de Fautea (Corse, France).

| Grain.<br>spot         | U<br>(ppm) | Th<br>(ppm) | Th/U | <sup>206</sup> Pb*<br>(ppm) | <sup>206</sup> Pb/<br><sup>204</sup> Pb | f <sub>206</sub><br>% | Total                                  |          |                                         |          | Radiogenic                             |          | Age (Ma)                               |          |
|------------------------|------------|-------------|------|-----------------------------|-----------------------------------------|-----------------------|----------------------------------------|----------|-----------------------------------------|----------|----------------------------------------|----------|----------------------------------------|----------|
|                        |            |             |      |                             |                                         |                       | <sup>238</sup> U/<br><sup>206</sup> Pb | ±<br>[1] | <sup>207</sup> Pb/<br><sup>206</sup> Pb | ±<br>[1] | <sup>206</sup> Pb/<br><sup>238</sup> U | ±<br>[1] | <sup>206</sup> Pb/<br><sup>238</sup> U | ±<br>[1] |
| <i>07Asco2</i>         |            |             |      |                             |                                         |                       |                                        |          |                                         |          |                                        |          |                                        |          |
| 1.1                    | 468        | 304         | 0.65 | 44.6                        | 13638                                   | <0.01                 | 9.021                                  | 0.164    | 0.06181                                 | 0.00041  | 0.1109                                 | 0.0020   | 678                                    | 12       |
| 1.2                    | 634        | 140         | 0.22 | 56.1                        | 34449                                   | <0.01                 | 9.718                                  | 0.159    | 0.06045                                 | 0.00035  | 0.1029                                 | 0.0017   | 632                                    | 10       |
| 2.1                    | 179        | 67          | 0.37 | 15.4                        | -                                       | 0.019                 | 10.006                                 | 0.172    | 0.06045                                 | 0.00067  | 0.0999                                 | 0.0017   | 614                                    | 10       |
| 3.1                    | 661        | 71          | 0.11 | 62.8                        | 808859                                  | <0.01                 | 9.044                                  | 0.147    | 0.06185                                 | 0.00034  | 0.1106                                 | 0.0018   | 676                                    | 11       |
| 5.1                    | 289        | 43          | 0.15 | 20.1                        | -                                       | 0.230                 | 12.314                                 | 0.221    | 0.05914                                 | 0.00058  | 0.0810                                 | 0.0015   | 502                                    | 9        |
| 6.1                    | 135        | 50          | 0.37 | 10.2                        | 6966                                    | 0.300                 | 11.368                                 | 0.201    | 0.06076                                 | 0.00081  | 0.0877                                 | 0.0016   | 542                                    | 9        |
| 7.1                    | 252        | 58          | 0.23 | 18.6                        | 9144                                    | 0.158                 | 11.627                                 | 0.197    | 0.05932                                 | 0.00076  | 0.0859                                 | 0.0015   | 531                                    | 9        |
| 8.1                    | 443        | 67          | 0.15 | 29.9                        | 17435                                   | <0.01                 | 12.721                                 | 0.210    | 0.05617                                 | 0.00047  | 0.0787                                 | 0.0013   | 488                                    | 8        |
| 9.1                    | 568        | 248         | 0.44 | 37.6                        | 15052                                   | 0.100                 | 12.979                                 | 0.212    | 0.05746                                 | 0.00043  | 0.0770                                 | 0.0013   | 478                                    | 8        |
| 10.1                   | 379        | 242         | 0.64 | 33.4                        | 39424                                   | <0.01                 | 9.749                                  | 0.161    | 0.06048                                 | 0.00046  | 0.1026                                 | 0.0017   | 630                                    | 10       |
| 11.1                   | 337        | 35          | 0.10 | 21.8                        | 5951                                    | 0.091                 | 13.298                                 | 0.222    | 0.05711                                 | 0.00055  | 0.0751                                 | 0.0013   | 467                                    | 8        |
| 11.2                   | 1084       | 352         | 0.32 | 89.7                        | 15458                                   | 0.188                 | 10.386                                 | 0.176    | 0.06120                                 | 0.00029  | 0.0961                                 | 0.0016   | 592                                    | 10       |
| 13.1                   | 392        | 221         | 0.56 | 23.1                        | 6397                                    | 0.191                 | 14.609                                 | 0.374    | 0.05689                                 | 0.00062  | 0.0683                                 | 0.0018   | 426                                    | 11       |
| 14.1                   | 281        | 179         | 0.64 | 24.3                        | 6487                                    | 0.093                 | 9.945                                  | 0.167    | 0.06114                                 | 0.00055  | 0.1005                                 | 0.0017   | 617                                    | 10       |
| 14.2                   | 373        | 33          | 0.09 | 24.0                        | -                                       | 0.217                 | 13.350                                 | 0.244    | 0.05807                                 | 0.00055  | 0.0747                                 | 0.0014   | 465                                    | 8        |
| <i>JYC 39 (Fautea)</i> |            |             |      |                             |                                         |                       |                                        |          |                                         |          |                                        |          |                                        |          |
| 1.1                    | 6          | 1           | 0.12 | 0.3                         | 52                                      | 2.568                 | 18.060                                 | 0.875    | 0.07390                                 | 0.00726  | 0.0539                                 | 0.0027   | 339                                    | 16       |
| 1.2                    | 454        | 477         | 1.05 | 24.0                        | 2630                                    | 0.266                 | 16.300                                 | 0.239    | 0.05643                                 | 0.00065  | 0.0612                                 | 0.0009   | 383                                    | 6        |
| 2.1                    | 10         | 3           | 0.32 | 0.5                         | -                                       | 1.873                 | 18.245                                 | 0.683    | 0.06829                                 | 0.00525  | 0.0538                                 | 0.0021   | 338                                    | 13       |
| 2.2                    | 425        | 353         | 0.83 | 27.4                        | 21516                                   | 0.055                 | 13.311                                 | 0.181    | 0.05681                                 | 0.00068  | 0.0751                                 | 0.0010   | 467                                    | 6        |
| 3.1                    | 157        | 34          | 0.22 | 15.3                        | -                                       | 0.317                 | 8.845                                  | 0.133    | 0.06502                                 | 0.00091  | 0.1127                                 | 0.0017   | 688                                    | 10       |
| 3.2                    | 69         | 5           | 0.08 | 5.4                         | -                                       | 0.116                 | 11.107                                 | 0.201    | 0.05962                                 | 0.00144  | 0.0899                                 | 0.0017   | 555                                    | 10       |
| 4.1                    | 516        | 437         | 0.85 | 31.3                        | -                                       | 0.024                 | 14.146                                 | 0.191    | 0.05589                                 | 0.00058  | 0.0707                                 | 0.0010   | 440                                    | 6        |
| 4.2                    | 16         | 1           | 0.09 | 0.8                         | -                                       | 1.314                 | 18.091                                 | 0.594    | 0.06390                                 | 0.00430  | 0.0546                                 | 0.0018   | 342                                    | 11       |
| 5.1                    | 282        | 109         | 0.39 | 13.4                        | 3866                                    | 0.165                 | 18.016                                 | 0.261    | 0.05477                                 | 0.00089  | 0.0554                                 | 0.0008   | 348                                    | 5        |
| 5.2                    | 426        | 230         | 0.54 | 24.5                        | 11355                                   | 0.095                 | 14.914                                 | 0.205    | 0.05591                                 | 0.00066  | 0.0670                                 | 0.0009   | 418                                    | 6        |
| 6.1                    | 417        | 264         | 0.63 | 23.4                        | 3676                                    | 0.116                 | 15.317                                 | 0.212    | 0.05582                                 | 0.00071  | 0.0652                                 | 0.0009   | 407                                    | 6        |
| 7.1                    | 793        | 502         | 0.63 | 49.9                        | 20598                                   | 0.053                 | 13.661                                 | 0.190    | 0.05650                                 | 0.00056  | 0.0732                                 | 0.0010   | 455                                    | 6        |
| 8.1                    | 100        | 28          | 0.28 | 4.7                         | 1072                                    | 0.458                 | 18.228                                 | 0.345    | 0.05701                                 | 0.00179  | 0.0546                                 | 0.0011   | 343                                    | 6        |
| 9.1                    | 682        | 571         | 0.84 | 43.7                        | -                                       | 0.070                 | 13.407                                 | 0.202    | 0.05685                                 | 0.00057  | 0.0745                                 | 0.0011   | 463                                    | 7        |
| 9.2                    | 6          | 1           | 0.10 | 0.3                         | -                                       | 4.666                 | 16.620                                 | 1.019    | 0.09133                                 | 0.00997  | 0.0574                                 | 0.0037   | 360                                    | 22       |
| 10.1                   | 116        | 32          | 0.28 | 5.6                         | -                                       | <0.01                 | 17.692                                 | 0.410    | 0.05262                                 | 0.00157  | 0.0566                                 | 0.0013   | 355                                    | 8        |
| 10.2                   | 127        | 31          | 0.24 | 6.1                         | -                                       | <0.01                 | 17.881                                 | 0.421    | 0.05307                                 | 0.00149  | 0.0560                                 | 0.0013   | 351                                    | 8        |
| 11.1                   | 288        | 99          | 0.34 | 13.6                        | 2834                                    | 0.083                 | 18.183                                 | 0.277    | 0.05405                                 | 0.00106  | 0.0550                                 | 0.0008   | 345                                    | 5        |
| 12.1                   | 232        | 78          | 0.34 | 15.5                        | 3758                                    | 0.058                 | 12.831                                 | 0.193    | 0.05726                                 | 0.00093  | 0.0779                                 | 0.0012   | 484                                    | 7        |
| 13.1                   | 11         | 4           | 0.35 | 0.9                         | 272                                     | <0.01                 | 10.349                                 | 0.433    | 0.05906                                 | 0.00419  | 0.0967                                 | 0.0041   | 595                                    | 24       |
| 14.1                   | 176        | 89          | 0.50 | 8.1                         | -                                       | 0.160                 | 18.754                                 | 0.374    | 0.05442                                 | 0.00132  | 0.0532                                 | 0.0011   | 334                                    | 7        |

Notes :  
 [1] Uncertainties given at one  $\sigma$  level.  
 [2] f<sub>206</sub> % denotes the percentage de <sup>206</sup>Pb that is common Pb  
 [3] Correction for common Pb made using the measured <sup>238</sup>U/<sup>206</sup>Pb and <sup>207</sup>Pb/<sup>206</sup>Pb ratios following Tera and Wasserburg (1972) as outlined in Williams (1998).
